# Supplementary material
Source: Springer Nature journal article supplement (https://springermedizin.de/resource/supplementary/12936_2014_3715_MOESM1_ESM.pdf/9545260)
Supplement: MOESM1 [file 9545260]

## Model extension

### Parasite resistance

Decreased drug sensitivity

### Adherence

Delayed or missed dose(s)

Food intake

### Patient's random age and corresponding region-specific weight

Weight- or regional age-based dosing regimen

## Original model

### PD component: Drug concentration-effect curve

Depends on:

IC<sub>50</sub>

Slope factor

Maximal parasite killing

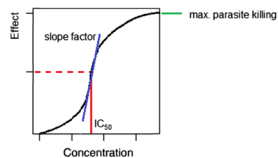

### PK component: Drug concentration-time curve

Depends on:

Volume of distribution

Elimination rate

Dose intake time

Dose

Absorption rate\*

Conversion rate\*

Partner drug

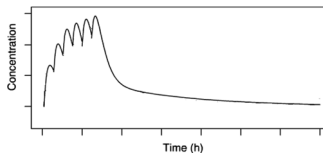

Artemisinin and DHA\*

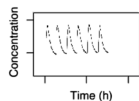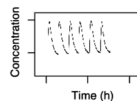

### PK/PD model: Treatment outcome based on parasite numbers

$$P_t = P_0 e^{(a-f(t))t} \prod_{d=1}^r e^{-f(C_d)}$$

The number of parasites  $P_t$  at time  $t$  depends on

Initial parasite number  $P_0$

Parasite growth rate  $a$

Effect of patient immunity  $f(I)$

Number of drugs  $r$

Effect of drug  $f(C)^*$
